# Supplementary material for: Transcriptomics and metabolomics analysis of L-phenylalanine overproduction in Escherichia coli
Source: Microb Cell Fact. 2023 Apr 6;22:65. doi: 10.1186/s12934-023-02070-w (PMC10080781; doi:10.1186/s12934-023-02070-w)
Supplement: Supplementary file 1 — Additional file 1: Table S1. The significantly differentially expressed genes screened based on KEGG pathway analysis (X16 vs. X24). Table S2. The significantly differentially expressed genes screened based on KEGG pathway analysis (X24 vs. X48). Table S3. Relative abundances of intracellular metabolites at different fermentation time in an L-Phe overproducing E. coli. [file 12934_2023_2070_MOESM1_ESM.xlsx]

## Sheet: TableS1
	The significantly differentially expressed genes screened based on KEGG pathway analysis (X16 vs. X24)
	Name	Gene ID	X16_FPKM	X24_FPKM	log2fold change	Pvalue	Padj	Regulation trend	Description
	crr	b2417	1693.45	498.6	-2.62803	3.7e-12	1.52e-10	DOWN	enzyme IIA(Glc)
	ptsH	b2415	377.688	176.601	-1.96039	2.17e-07	2.26e-06	DOWN	phosphocarrier protein HPr
	ptsG	b1101	395.143	232.123	-1.63155	8.25e-06	4.83e-05	DOWN	glucose-specific PTS enzyme IIBC component
	ptsI	b2416	1025.3	481.195	-1.95546	1.09e-07	1.32e-06	DOWN	PTS enzyme I
	pgi	b4025	324.881	345.406	-0.775748	0.0304916	0.0556842	DOWN	glucose-6-phosphate isomerase
	pfkA	b3916	574.51	733.707	-0.51127	0.152521	0.222021	DOWN	6-phosphofructokinase 1
	fbp	b4232	268.873	318.758	-0.61857	0.0858995	0.136347	DOWN	fructose-1,6-bisphosphatase 1
	fbaA	b2925	1015.25	909.825	-1.02231	0.00444865	0.0105396	DOWN	fructose-bisphosphate aldolase class II
	fbaB	b2097	414.486	1257.48	0.736957	0.0396446	0.0700307	UP	fructose-bisphosphate aldolase class I
	gapA	b1779	7675.83	5020.33	-1.47669	4.58e-05	0.000203395	DOWN	glyceraldehyde-3-phosphate dehydrogenase A
	pgk	b2926	533.025	570.822	-0.765293	0.032837	0.059365	DOWN	phosphoglycerate kinase
	gpmM	b3612	820.491	619.78	-1.26887	0.00044164	0.00142666	DOWN	2,3-bisphosphoglycerate-independent phosphoglycerate mutase
	gpmA	b0755	783.436	3582.16	1.32876	0.000238419	0.00084266	UP	2,3-bisphosphoglycerate-dependent phosphoglycerate mutase
	eno	b2779	1662.29	778.246	-1.959	1.03e-07	1.26e-06	DOWN	enolase
	pykF	b1676	575.541	428.845	-1.28858	0.000367644	0.00122245	DOWN	pyruvate kinase I
	pykA	b1854	836.828	311.074	-2.29177	7.79e-10	2e-08	DOWN	pyruvate kinase II
	ppsA	b1702	156.1	141.805	-1.00265	0.00552681	0.0126902	DOWN	phosphoenolpyruvate synthetase
	ppc	b3956	257.717	230.082	-1.02776	0.00431975	0.010302	DOWN	phosphoenolpyruvate carboxylase
	zwf	b1852	398.675	323.939	-1.16361	0.00125703	0.00353457	DOWN	NADP(+)-dependent glucose-6-phosphate dehydrogenase
	pgl	b0767	92.2881	205.004	0.287232	0.431862	0.524323	UP	6-phosphogluconolactonase
	gnd	b2029	580.976	1440.35	0.445703	0.21117	0.291481	UP	6-phosphogluconate dehydrogenase, decarboxylating
	rpe	b3386	66.5282	78.0764	-0.632929	0.0973807	0.152111	DOWN	ribulose-phosphate 3-epimerase
	rpiA	b2914	468.944	361.682	-1.23877	0.000646694	0.0019753	DOWN	ribose-5-phosphate isomerase A
	tktA	b2935	372.497	360.991	-0.909396	0.0113355	0.0238819	DOWN	transketolase 1
	tktB	b2465	252.853	231.218	-0.993158	0.00582472	0.0132825	DOWN	transketolase 2
	talB	b0008	1594.57	993.811	-1.54625	2.12e-05	0.000106564	DOWN	transaldolase B
	ldhA	b1380	24.4927	58.8729	0.400949	0.290887	0.37728	UP	D-lactate dehydrogenase
	pflB	b0903	3081.93	798.852	-2.81197	1.32e-13	6.85e-12	DOWN	pyruvate formate-lyase
	pflD	b3951	6.6753	30.8241	1.34201	0.000772085	0.00229975	UP	putative formate acetyltransferase 2
	gltA	b0720	118.098	305.348	0.506268	0.16091	0.23257	UP	citrate synthase
	pta	b2297	261.004	151.669	-1.64722	6.79e-06	4.11e-05	DOWN	phosphate acetyltransferase
	ackA	b2296	1203.69	518.688	-2.07864	1.9e-08	2.95e-07	DOWN	acetate kinase
	adhE	b1241	4409.29	1142.13	-2.81297	1.27e-13	6.7e-12	DOWN	fused acetaldehyde-CoA dehydrogenase and iron-dependent alcohol dehydrogenasealdehyde/alcohol dehydrogenase AdhE
	poxB	b0871	548.426	378.835	-1.39784	0.000116286	0.00044723	DOWN	pyruvate oxidase
	leuA	b0074	17.3206	86.4192	1.45412	0.000144268	0.000540879	UP	2-isopropylmalate synthase
	leuC	b0072	41.5934	250.728	1.72724	3.9e-06	2.57e-05	UP	3-isopropylmalate dehydratase subunit LeuC
	leuD	b0071	92.7595	294.498	0.802343	0.0303735	0.0555155	UP	3-isopropylmalate dehydratase subunit LeuD
	alaA	b2290	228.328	438.11	0.0760215	0.83321	0.886896	UP	glutamate--pyruvate aminotransferase AlaA
	ilvD	b3771	228.298	85.7962	-2.27587	1.39e-09	3.21e-08	DOWN	dihydroxy-acid dehydratase
	ilvE	b3770	249.357	115.714	-1.97149	1.45e-07	1.64e-06	DOWN	branched-chain-amino-acid aminotransferase
	acnB	b0118	403.623	345.233	-1.08957	0.00246894	0.00637703	DOWN	hypothetical protein
	icd	b1136	460.127	2675.36	1.67545	4.42e-06	2.84e-05	UP	isocitrate dehydrogenase
	sucA	b0726	29.3232	167.386	1.6487	8.55e-06	4.98e-05	UP	subunit of E1(0) component of 2-oxoglutarate dehydrogenase
	sucB	b0727	83.9075	224.656	0.556609	0.125563	0.188628	UP	dihydrolipoyltranssuccinylase
	sucC	b0728	53.1635	176.962	0.870592	0.0182523	0.035947	UP	succinyl-CoA synthetase subunit beta
	sucD	b0729	134.337	162.506	-0.589418	0.107875	0.166194	DOWN	succinyl-CoA synthetase subunit alpha
	sdhA	b0723	17.6506	81.2441	1.3379	0.000419539	0.00136754	UP	succinate:quinone oxidoreductase, FAD binding protein
	sdhB	b0724	22.8759	63.8966	0.617228	0.126124	0.189339	UP	succinate:quinone oxidoreductase, iron-sulfur cluster binding protein
	fumA	b1612	36.6744	82.4911	0.305234	0.409184	0.502778	UP	fumarase A
	fumB	b4122	93.2529	39.9631	-2.08613	4.09e-08	5.68e-07	DOWN	fumarase B
	fumC	b1611	27.1163	112.61	1.18958	0.00153512	0.00424466	UP	fumarase C
	fumD	b1675	3.11964	19.2512	1.7353	0.0524395	0.0892732	UP	fumarase D
	mdh	b3236	1731.8	2325.24	-0.43904	0.21751	0.298704	DOWN	malate dehydrogenase
	maeB	b2463	113.628	228.784	0.145504	0.685679	0.761102	UP	NADP(+)-dependent malate dehydrogenase
	gltB	b3212	173.497	274.086	-0.20443	0.566296	0.651701	DOWN	glutamate synthase subunit GltB
	glnA	b3870	418.535	518.243	-0.55586	0.119828	0.181147	DOWN	glutamine synthetase
	serA	b2913	171.089	242.369	-0.361668	0.315717	0.403546	DOWN	phosphoglycerate dehydrogenase
	serC	b0907	281.936	538.666	0.0698629	0.846349	0.89714	UP	phosphoserine/phosphohydroxythreonine aminotransferase
	glyA	b2551	239.33	495.152	0.184702	0.606132	0.690006	UP	serine hydroxymethyltransferase
	aroG	b0754	892.706	560.892	-1.53459	2.42e-05	0.000118422	DOWN	3-deoxy-7-phosphoheptulonate synthase, Phe-sensitive
	aroH	b1704	118.614	98.2015	-1.13639	0.00207766	0.00547924	DOWN	3-deoxy-7-phosphoheptulonate synthase, Trp-sensitive
	aroF	b2601	7608.14	21742.8	0.650761	0.0677808	0.11212	UP	3-deoxy-7-phosphoheptulonate synthase, Tyr-sensitive
	aroB	b3389	223.71	208.854	-0.963204	0.00783452	0.0172992	DOWN	3-dehydroquinate synthase
	aroD	b1693	21.4648	62.3986	0.674826	0.0930817	0.146349	UP	3-dehydroquinate dehydratase
	aroE	b3281	124.071	164.38	-0.458204	0.212014	0.292459	DOWN	shikimate dehydrogenase
	ydiB	b1692	7.06627	21.3377	0.728616	0.116692	0.177026	UP	quinate/shikimate dehydrogenase
	aroK	b3390	230.962	169.433	-1.31079	0.000420711	0.00137032	DOWN	shikimate kinase 1
	aroL	b0388	1715.84	711.382	-2.1343	8.8e-09	1.55e-07	DOWN	shikimate kinase 2
	aroA	b0908	57.2174	97.8761	-0.0896355	0.811525	0.870585	DOWN	3-phosphoshikimate 1-carboxyvinyltransferase
	aroC	b2329	63.4384	72.0141	-0.681014	0.0687551	0.113514	DOWN	chorismate synthase
	pheA	b2599	1614.39	11483	1.96628	8.97e-08	1.12e-06	UP	fused chorismate mutase/prephenate dehydratase
	tyrB	b4054	312.309	381.849	-0.574096	0.109653	0.168143	DOWN	tyrosine aminotransferase
	aspC	b0928	199.365	698.024	0.943669	0.00876995	0.0190626	UP	aspartate aminotransferase
	trpE	b1264	356.925	46.6905	-3.79799	3.96e-21	5.35e-19	DOWN	anthranilate synthase subunit TrpE
	trpD	b1263	293.231	44.2237	-3.59271	2.41e-19	2.81e-17	DOWN	anthranilate synthase subunit TrpD
	trpC	b1262	192.55	65.8966	-2.4107	2.55e-10	7.34e-09	DOWN	fused indole-3-glycerol phosphate synthase/phosphoribosylanthranilate isomerase
	trpB	b1261	255.904	123.655	-1.91321	2.79e-07	2.82e-06	DOWN	tryptophan synthase subunit beta
	trpA	b1260	273.974	146.656	-1.76549	2.11e-06	1.55e-05	DOWN	tryptophan synthase subunit alpha
	tyrA	b2600	3393.45	6145.28	-0.00742946	0.98335	1	DOWN	fused chorismate mutase/prephenate dehydrogenase
	xylE	b4031	13.6882	50.2047	1.01027	0.0082327	0.0180218	UP	D-xylose:H(+) symporter
	xylF	b3566	10.81	89.4886	2.18382	4.95e-08	6.72e-07	UP	xylose ABC transporter periplasmic binding protein
	xylH	b3568	6.6675	33.9112	1.48034	0.000637694	0.00195472	UP	xylose ABC transporter membrane subunit
	xylG	b3567	4.34996	38.4824	2.27813	1.19e-07	1.39e-06	UP	xylose ABC transporter ATP binding subunit
	lamB	b4036	9.83375	33.9803	0.923996	0.0209965	0.0404297	UP	maltose outer membrane channel/phage lambda receptor protein
	malE	b4034	9.28878	59.7109	1.81888	6.37e-06	3.89e-05	UP	maltose ABC transporter periplasmic binding protein
	malF	b4033	4.92876	44.0221	2.29229	6.05e-08	7.85e-07	UP	maltose ABC transporter membrane subunit MalF
	malK	b4035	5.95668	40.4344	1.8961	1.5e-05	7.96e-05	UP	maltose ABC transporter ATP binding subunit
	malG	b4032	6.31721	35.1474	1.60971	0.000207266	0.000744744	UP	maltose ABC transporter membrane subunit MalG
	glpT	b2240	5.78209	56.4186	2.41975	1.17e-08	1.97e-07	UP	sn-glycerol 3-phosphate:phosphate antiporter
	galP	b2943	17.8676	61.1223	0.90978	0.0171982	0.0340574	UP	galactose:H(+) symporter
	gadA	b3517	1535.27	47.0976	-5.89027	1.43e-40	3.08e-37	DOWN	glutamate decarboxylase A
	gadB	b1493	3350.6	113.463	-5.74803	1.51e-39	2.17e-36	DOWN	glutamate decarboxylase B
	gadC	b1492	6390.01	177.183	-6.0365	1.22e-42	5.25e-39	DOWN	L-glutamate:4-aminobutyrate antiporter
	gadE	b3512	459.22	124.175	-2.75066	7.33e-13	3.26e-11	DOWN	DNA-binding transcriptional activator GadE
	ptsA	b3947	5.97336	35.9508	1.72418	1.28e-05	7.01e-05	UP	putative PTS multiphosphoryl transfer protein PtsA
	phnC	b4106	3.50624	50.3745	2.97285	1.05e-09	2.5e-08	UP	phosphonate/phosphate ABC transporter ATP binding subunit
	phnD	b4105	5.75527	34.9599	1.73575	9.28e-05	0.000368012	UP	phosphonate/phosphate ABC transporter periplasmic binding protein
	phnF	b4102	5.42394	98.5015	3.3157	8.45e-15	5.45e-13	UP	putative transcriptional regulator PhnF
	phnG	b4101	4.44187	65.4009	3.005	8.82e-09	1.55e-07	UP	carbon-phosphorus lyase core complex subunit PhnG
	phnI	b4099	10.7064	102.887	2.39858	4.69e-09	9e-08	UP	carbon-phosphorus lyase core complex subunit PhnI
	phnJ	b4098	2.37845	19.8273	2.18551	7.04e-05	0.000295633	UP	carbon-phosphorus lyase core complex subunit PhnJ
	phnK	b4097	8.36458	93.2529	2.61171	1.03e-09	2.47e-08	UP	carbon-phosphorus lyase subunit PhnK
	phnM	b4095	10.1759	105.76	2.51162	8.37e-10	2.1e-08	UP	RPnTP hydrolase
	phnN	b4094	2.10352	26.5471	2.77531	6.38e-06	3.89e-05	UP	ribose 1,5-bisphosphate phosphokinase
	ugpE	b3451	0.792816	12.8749	3.1244	7.72e-06	4.6e-05	UP	sn-glycerol 3-phosphate ABC transporter membrane subunit UgpE
	ugpC	b3450	19.0831	109.125	1.65062	2.38e-05	0.000116737	UP	sn-glycerol 3-phosphate ABC transporter ATP binding subunit
	pstB	b3725	27.3054	80.4709	0.694739	0.0725272	0.118429	UP	phosphate ABC transporter ATP binding subunit
	phoR	b0400	13.0129	43.633	0.880664	0.0258749	0.0483572	UP	sensor histidine kinase PhoR
	phoB	b0399	39.8545	84.6114	0.22182	0.565166	0.650747	UP	DNA-binding transcriptional dual regulator PhoB

## Sheet: TableS2
	The significantly differentially expressed genes screened based on KEGG pathway analysis (X24 vs. X48)
	Name	Gene ID	X24_FPKM	X48_FPKM	log2fold change	Pvalue	Padj	Regulation trend	Description
	crr	b2417	498.6	145.887	-2.29074	1.71802e-09	2.78523e-08	DOWN	enzyme IIA(Glc)
	ptsH	b2415	176.601	31.8895	-2.98456	1.28281e-12	3.0759e-11	DOWN	phosphocarrier protein HPr
	ptsG	b1101	232.123	84.8203	-1.97029	1.30874e-07	1.53928e-06	DOWN	glucose-specific PTS enzyme IIBC component
	ptsI	b2416	481.195	127.298	-2.43639	1.00778e-10	1.94389e-09	DOWN	PTS enzyme I
	pgi	b4025	345.406	153.512	-1.68799	4.11957e-06	3.70164e-05	DOWN	glucose-6-phosphate isomerase
	pfkA	b3916	733.707	118.542	-3.14766	5.67395e-16	2.01844e-14	DOWN	6-phosphofructokinase 1
	fbp	b4232	318.758	149.397	-1.61126	1.24705e-05	0.00010231	DOWN	fructose-1,6-bisphosphatase 1
	fbaA	b2925	909.825	145.734	-3.16016	4.13939e-16	1.52245e-14	DOWN	fructose-bisphosphate aldolase class II
	fbaB	b2097	1257.48	205.715	-3.12978	5.10193e-16	1.8452e-14	DOWN	fructose-bisphosphate aldolase class I
	gapA	b1779	5020.33	137.691	-5.70616	3.62014e-39	5.23714e-36	DOWN	glyceraldehyde-3-phosphate dehydrogenase A
	pgk	b2926	570.822	101.052	-3.01575	7.07161e-15	2.34281e-13	DOWN	phosphoglycerate kinase
	gpmM	b3612	619.78	97.3073	-3.18905	2.28397e-16	8.77207e-15	DOWN	2,3-bisphosphoglycerate-independent phosphoglycerate mutase
	gpmA	b0755	3582.16	288.825	-4.15053	8.64491e-25	1.21029e-22	DOWN	2,3-bisphosphoglycerate-dependent phosphoglycerate mutase
	eno	b2779	778.246	81.0178	-3.78167	3.46092e-21	2.88853e-19	DOWN	enolase
	pykF	b1676	428.845	114.44	-2.42381	1.30572e-10	2.49639e-09	DOWN	pyruvate kinase I
	pykA	b1854	311.074	111.274	-2.00112	7.20174e-08	8.90471e-07	DOWN	pyruvate kinase II
	ppsA	b1702	141.805	129.172	-0.652703	0.0700643	0.191969	DOWN	phosphoenolpyruvate synthetase
	ppc	b3956	230.082	101.561	-1.69783	3.73133e-06	3.38627e-05	DOWN	phosphoenolpyruvate carboxylase
	zwf	b1852	323.939	119.091	-1.96168	1.12123e-07	1.32955e-06	DOWN	NADP(+)-dependent glucose-6-phosphate dehydrogenase
	pgl	b0767	205.004	196.797	-0.577011	0.110926	0.255918	DOWN	6-phosphogluconolactonase
	gnd	b2029	1440.35	146.139	-3.81895	1.04763e-21	9.47234e-20	DOWN	6-phosphogluconate dehydrogenase, decarboxylating
	rpe	b3386	78.0764	28.7738	-1.9566	1.33036e-06	1.30628e-05	DOWN	ribulose-phosphate 3-epimerase
	rpiA	b2914	361.682	133.823	-1.95224	1.77716e-07	2.05676e-06	DOWN	ribose-5-phosphate isomerase A
	tktA	b2935	360.991	129.36	-1.99858	6.69437e-08	8.37279e-07	DOWN	transketolase 1
	tktB	b2465	231.218	160.263	-1.04689	0.0037547	0.0188604	DOWN	transketolase 2
	talB	b0008	993.811	174.159	-3.03048	4.30556e-15	1.45985e-13	DOWN	transaldolase B
	ldhA	b1380	58.8729	72.2814	-0.222069	0.546746	0.68501	DOWN	D-lactate dehydrogenase
	pflB	b0903	798.852	203.515	-2.49085	3.31569e-11	6.69306e-10	DOWN	pyruvate formate-lyase
	pflD	b3951	30.8241	66.4134	0.589132	0.110399	0.255918	UP	putative formate acetyltransferase 2
	gltA	b0720	305.348	121.245	-1.85047	6.18217e-07	6.52813e-06	DOWN	citrate synthase
	pta	b2297	151.669	66.1854	-1.71428	3.54313e-06	3.2373e-05	DOWN	phosphate acetyltransferase
	ackA	b2296	518.688	71.1964	-3.38273	8.55811e-18	4.0372e-16	DOWN	acetate kinase
	adhE	b1241	1142.13	147.226	-3.47368	6.64459e-19	3.60469e-17	DOWN	fused acetaldehyde-CoA dehydrogenase and iron-dependent alcohol dehydrogenasealdehyde/alcohol dehydrogenase AdhE
	poxB	b0871	378.835	132.939	-2.0288	4.46702e-08	5.82189e-07	DOWN	pyruvate oxidase
	leuA	b0074	86.4192	76.7005	-0.690118	0.0598279	0.172527	DOWN	2-isopropylmalate synthase
	leuC	b0072	250.728	72.3756	-2.31034	1.04004e-09	1.75633e-08	DOWN	3-isopropylmalate dehydratase subunit LeuC
	leuD	b0071	294.498	122.503	-1.78316	2.11475e-06	1.97802e-05	DOWN	3-isopropylmalate dehydratase subunit LeuD
	alaA	b2290	438.11	123.112	-2.34923	4.61206e-10	8.03869e-09	DOWN	glutamate--pyruvate aminotransferase AlaA
	ilvD	b3771	85.7962	93.7707	-0.389857	0.283579	0.446565	DOWN	dihydroxy-acid dehydratase
	ilvE	b3770	115.714	81.5537	-1.02259	0.00597387	0.0282733	DOWN	branched-chain-amino-acid aminotransferase
	acnB	b0118	345.233	229.66	-1.10617	0.00215385	0.0116023	DOWN	hypothetical protein
	icd	b1136	2675.36	256.071	-3.90314	1.33616e-22	1.34859e-20	DOWN	isocitrate dehydrogenase
	sucA	b0726	167.386	110.972	-1.11104	0.00215472	0.0116023	DOWN	subunit of E1(0) component of 2-oxoglutarate dehydrogenase
	sucB	b0727	224.656	97.6982	-1.7192	3.60074e-06	3.27615e-05	DOWN	dihydrolipoyltranssuccinylase
	sucC	b0728	176.962	114.46	-1.14656	0.00178802	0.00977332	DOWN	succinyl-CoA synthetase subunit beta
	sucD	b0729	162.506	62.695	-1.89162	6.48768e-07	6.81756e-06	DOWN	succinyl-CoA synthetase subunit alpha
	sdhA	b0723	81.2441	93.5068	-0.315279	0.387871	0.549399	DOWN	succinate:quinone oxidoreductase, FAD binding protein
	sdhB	b0724	63.8966	92.8803	0.0214858	0.966111	0.997433	UP	succinate:quinone oxidoreductase, iron-sulfur cluster binding protein
	fumA	b1612	82.4911	111.989	-0.0770762	0.836074	0.912845	DOWN	fumarase A
	fumB	b4122	39.9631	75.6873	0.403138	0.277095	0.440182	UP	fumarase B
	fumC	b1611	112.61	157.934	-0.0301478	0.936779	0.977356	DOWN	fumarase C
	fumD	b1675	19.2512	49.9985	0.855492	0.102456	0.243781	UP	fumarase D
	mdh	b3236	2325.24	252.809	-3.71925	5.65504e-21	4.54498e-19	DOWN	malate dehydrogenase
	maeB	b2463	228.784	125.473	-1.38466	0.000142536	0.000977261	DOWN	NADP(+)-dependent malate dehydrogenase
	gltB	b3212	274.086	96.7075	-2.021	4.52887e-08	5.87394e-07	DOWN	glutamate synthase subunit GltB
	glnA	b3870	518.243	115.369	-2.68533	1.70032e-12	3.88389e-11	DOWN	glutamine synthetase
	serA	b2913	242.369	108.172	-1.6818	5.62266e-06	4.90992e-05	DOWN	phosphoglycerate dehydrogenase
	serC	b0907	538.666	105.136	-2.87497	8.17377e-14	2.33383e-12	DOWN	phosphoserine/phosphohydroxythreonine aminotransferase
	glyA	b2551	495.152	140.221	-2.33813	4.90793e-10	8.52016e-09	DOWN	serine hydroxymethyltransferase
	aroG	b0754	560.892	122.551	-2.71232	8.95963e-13	2.22199e-11	DOWN	3-deoxy-7-phosphoheptulonate synthase, Phe-sensitive
	aroH	b1704	98.2015	96.2104	-0.547565	0.138484	0.291193	DOWN	3-deoxy-7-phosphoheptulonate synthase, Trp-sensitive
	aroF	b2601	21742.8	16220.5	-0.940859	0.00856065	0.0383023	DOWN	3-deoxy-7-phosphoheptulonate synthase, Tyr-sensitive
	aroB	b3389	208.854	97.6013	-1.61542	1.32594e-05	0.000107764	DOWN	3-dehydroquinate synthase
	aroD	b1693	62.3986	53.7408	-0.733222	0.0559058	0.165133	DOWN	3-dehydroquinate dehydratase
	aroE	b3281	164.38	76.8077	-1.61538	1.79931e-05	0.000144344	DOWN	shikimate dehydrogenase
	ydiB	b1692	21.3377	48.7467	0.673155	0.0964604	0.235035	UP	quinate/shikimate dehydrogenase
	aroK	b3390	169.433	73.6018	-1.72025	8.33809e-06	7.06784e-05	DOWN	shikimate kinase 1
	aroL	b0388	711.382	187.646	-2.44044	1.2309e-10	2.36377e-09	DOWN	shikimate kinase 2
	aroA	b0908	97.8761	97.3975	-0.525109	0.151052	0.306339	DOWN	3-phosphoshikimate 1-carboxyvinyltransferase
	aroC	b2329	72.0141	68.184	-0.596786	0.109295	0.254201	DOWN	chorismate synthase
	pheA	b2599	11483	13474.8	-0.28737	0.418371	0.576788	DOWN	fused chorismate mutase/prephenate dehydratase
	tyrB	b4054	381.849	155.899	-1.81037	9.8689e-07	1.00072e-05	DOWN	tyrosine aminotransferase
	aspC	b0928	698.024	164.367	-2.60435	5.56766e-12	1.21425e-10	DOWN	aspartate aminotransferase
	trpE	b1264	46.6905	93.2296	0.4794	0.195802	0.354531	UP	anthranilate synthase subunit TrpE
	trpD	b1263	44.2237	67.9775	0.102069	0.794282	0.882084	UP	anthranilate synthase subunit TrpD
	trpC	b1262	65.8966	68.9869	-0.451896	0.22558	0.387269	DOWN	fused indole-3-glycerol phosphate synthase/phosphoribosylanthranilate isomerase
	trpB	b1261	123.655	78.4708	-1.17397	0.00149199	0.00835512	DOWN	tryptophan synthase subunit beta
	trpA	b1260	146.656	124.723	-0.751668	0.0418875	0.135665	DOWN	tryptophan synthase subunit alpha
	tyrA	b2600	6145.28	9306.31	0.0805909	0.820353	0.900439	UP	fused chorismate mutase/prephenate dehydrogenase
	xylE	b4031	50.2047	114.843	0.675519	0.0650854	0.18177	UP	D-xylose:H(+) symporter
	xylF	b3566	89.4886	190.413	0.571132	0.117231	0.263723	UP	xylose ABC transporter periplasmic binding protein
	xylH	b3568	33.9112	51.367	0.0808976	0.834512	0.912058	UP	xylose ABC transporter membrane subunit
	xylG	b3567	38.4824	82.2585	0.577665	0.121127	0.269448	UP	xylose ABC transporter ATP binding subunit
	lamB	b4036	33.9803	83.5267	0.779173	0.0369806	0.123174	UP	maltose outer membrane channel/phage lambda receptor protein
	malE	b4034	59.7109	128.75	0.590242	0.108976	0.253595	UP	maltose ABC transporter periplasmic binding protein
	malF	b4033	44.0221	91.4275	0.536128	0.147331	0.303041	UP	maltose ABC transporter membrane subunit MalF
	malK	b4035	40.4344	92.8159	0.680397	0.0726374	0.196538	UP	maltose ABC transporter ATP binding subunit
	malG	b4032	35.1474	75.4861	0.584415	0.123127	0.27203	UP	maltose ABC transporter membrane subunit MalG
	glpT	b2240	56.4186	122.537	0.600703	0.103903	0.245744	UP	sn-glycerol 3-phosphate:phosphate antiporter
	galP	b2943	61.1223	103.802	0.245868	0.50226	0.653496	UP	galactose:H(+) symporter
	gadA	b3517	47.0976	12.7297	-2.40389	2.27088e-09	3.61011e-08	DOWN	glutamate decarboxylase A
	gadB	b1493	113.463	15.4504	-3.39299	1.03723e-16	4.24676e-15	DOWN	glutamate decarboxylase B
	gadC	b1492	177.183	89.0194	-1.51098	4.23402e-05	0.00032238	DOWN	L-glutamate:4-aminobutyrate antiporter
	gadE	b3512	124.175	49.6689	-1.83947	1.4671e-06	1.4118e-05	DOWN	DNA-binding transcriptional activator GadE
	ptsA	b3947	35.9508	77.0656	0.581822	0.112234	0.25638	UP	putative PTS multiphosphoryl transfer protein PtsA
	phnC	b4106	50.3745	500.241	2.79308	9.66349e-13	2.37361e-11	UP	phosphonate/phosphate ABC transporter ATP binding subunit
	phnD	b4105	34.9599	683.442	3.77015	1.67551e-20	1.27574e-18	UP	phosphonate/phosphate ABC transporter periplasmic binding protein
	phnF	b4102	98.5015	216.742	0.619545	0.0878481	0.221149	UP	putative transcriptional regulator PhnF
	phnG	b4101	65.4009	54.0516	-0.792356	0.0529737	0.159325	DOWN	carbon-phosphorus lyase core complex subunit PhnG
	phnI	b4099	102.887	134.955	-0.126698	0.732877	0.838789	DOWN	carbon-phosphorus lyase core complex subunit PhnI
	phnJ	b4098	19.8273	67.0619	1.23882	0.00226532	0.0121527	UP	carbon-phosphorus lyase core complex subunit PhnJ
	phnK	b4097	93.2529	119.164	-0.164368	0.660002	0.780903	DOWN	carbon-phosphorus lyase subunit PhnK
	phnM	b4095	105.76	96.8203	-0.645409	0.0795104	0.207004	DOWN	RPnTP hydrolase
	phnN	b4094	26.5471	43.1671	0.18299	0.673871	0.791931	UP	ribose 1,5-bisphosphate phosphokinase
	ugpE	b3451	12.8749	40.4725	1.13272	0.00887183	0.0392895	UP	sn-glycerol 3-phosphate ABC transporter membrane subunit UgpE
	ugpC	b3450	109.125	142.987	-0.128204	0.729889	0.83603	DOWN	sn-glycerol 3-phosphate ABC transporter ATP binding subunit
	pstB	b3725	80.4709	97.0321	-0.248066	0.507618	0.653692	DOWN	phosphate ABC transporter ATP binding subunit
	phoR	b0400	43.633	118.293	0.920494	0.013334	0.0551137	UP	sensor histidine kinase PhoR
	phoB	b0399	84.6114	306.68	1.33936	0.000336201	0.00215526	UP	DNA-binding transcriptional dual regulator PhoB

## Sheet: TableS3
	Relative abundances of intracellular metabolites at different fermentation time in an L-Phe overproducing E. coli
	Metabolite	Retention Time	8h		16 h		24 h		32h		40h		48h
			Mean	SD	Mean	SD	Mean	SD	Mean	SD	Mean	SD	Mean	SD
	Trehalose	18.44	1.47396e+06	101054	422608	19300.8	5.07118e+06	223570	234862	9405.1	216288	83994.4	79672.2	4913.17
	Glucose	12.94	2.05676e+06	98488.1	41400.5	2571.58	269240	10338.7	193288	5480.01	140430	3465	79633	3695.5
	Glucose-6-phosphate	24.22	31665	0	11983.5	446.5	6385.5	338.5	ND	ND	7697.75	1266.19	6389	404
	6-Phosphate-gluconate	9.74	ND	ND	ND	ND	16822.3	1184.12	118937	16502.3	307771	8950.58	214467	591.32
	Ribulose-5-phosphate	1.13	ND	ND	ND	ND	ND	ND	8518.75	1754.79	18916.3	2678.01	28969	1057.83
	Sedoheptulose-7-phosphate	2.09	19789	2491	6167.5	796.5	21645	1054.93	43519	760.805	56211.2	3132.2	36562.7	2671.38
	Pyruvate	3.26	98039.8	11361.5	20337.8	638.318	56800.2	2911.58	13120.8	516.724	13046.8	1499.2	9767	232.538
	Leucine	12.63	35836.2	1999.48	10598	684.871	53161.8	3538.01	90564.8	7312.65	221060	9057.52	150484	2525.12
	Valine	14.16	12923.2	1621.21	6502.75	429.745	86197	1905.1	134484	6288.39	368079	9515.27	238010	6162.17
	Alanine	12.39	10413.8	1039.68	11695.2	2570.49	13130.2	1277	14199.8	1282.15	56774.8	6029.56	33463.2	3327.7
	Malate	23.56	8674.75	353.253	5513.25	119.343	5507	383.466	6496.5	93.5	5083.75	711.044	5330	473
	Succinate	18.49	ND	ND	6986	19.5	11235.8	1212.2	6375.5	173.5	16289.5	428.5	14346.5	19.5
	Glyoxylic acid	3.23	10940.8	642.749	ND	ND	5451	17	6840.25	375.415	19656	2401.49	20555.2	1819.44
	Glutamate	19.39	43104.2	5142.57	18851.8	1257.56	21425.2	1644.44	ND	ND	24898.2	948.626	22229	865.167
	3-Deoxy-d-arabinoheptulosonate7-phosphate	2.16	5146.75	1068.44	5137.33	705.412	5569.33	431.408	6720.75	917.318	3856.5	395.19	4761.67	112.719
	3-Dehydroquinate	12.58	ND	ND	ND	ND	5766.75	834.276	5441	920.595	16772.2	3675.18	17294	1044.44
	3-Dehydroshikimate	9.66	35387.5	7975.32	23068	0	30298.5	3870.54	26677.5	1149.27	37986	3248.79	29233.3	1612.05
	Anthranilate	2.4	ND	ND	ND	ND	8720	165.5	ND	ND	45041.8	1616.39	22858.5	3907.19
	L-tryptophan	12.79	2799	134.6	ND	ND	5280.25	283.279	8477.25	1209.98	42904	7313.75	31754.2	741.07
	L-tyrosine	9.02	2.47088e+06	740480	112177	17995.7	23228	4289.86	11625	0	11828.5	522.699	12899.8	2363.77
	Phenylpyruvate	1.28	969865	125266	576815	34626.6	1.3336e+06	54522.8	1.39131e+06	165768	2691472	196507	1.6731e+06	72922.3
	L-phenylalanine	12.47	4.19274e+06	267932	3.47449e+06	148072	7.23273e+06	1.43013e+06	1.18622e+07	568483	3.75137e+07	2.18917e+06	2.76125e+07	827939
	Lactic acid	9.82	280492	16919.1	26307	1154.36	39766	1159.58	25941.8	1300.54	36210.2	3633.74	25112	3630.87
	Shikimate	12.63	ND	ND	ND	ND	6350.5	492.081	ND	ND	4288.5	787.5	4814.5	379.5
	3-Enol-acetonylshikimate-5-phosphate	16.6	9267	1481	7491.5	79.5	ND	ND	7480	1192	ND	ND	ND	ND
	Trans-Cinnamic acid	12.44	643107	61955.2	541707	19642.7	1.09671e+06	185026	1.84764e+06	142113	5.39763e+06	136592	4312227	42575.1
	Styrene	12.57	23141.2	2478.58	19062	930.084	38892	9192.39	60642.2	3231.19	204420	13240.8	158542	10499.6
	Phenylglyoxylic acid	1.51	79811.2	11647.3	58972.2	3236.31	25333.2	2029.33	15168.8	1063.63	8284	1368.2	7193	1134.56
	Phenylacetaldehyde	2.7	36316	6193.76	22788.5	1226.16	100982	4985.99	200985	7153.84	814723	17876.1	784198	12562.5
	γ- aminobutyric acid	19.56	4639.75	598.301	ND	ND	4191.75	250.247	ND	ND	2352	232.518	ND	ND
	Proline	14.17	2467.33	443.945	1714.67	168.794	ND	ND	ND	ND	ND	ND	1756	108.23
	Arginine	7.68	ND	ND	ND	ND	ND	ND	ND	ND	5789.5	749.5	5715	354
	Histidine	1.07	17246.2	1748.24	5058.5	261.5	ND	ND	ND	ND	ND	ND	6444	1503
	Isocitric acid	8.54	ND	ND	ND	ND	ND	ND	ND	ND	5599	18.4	5430	14.53
